# Supplementary material for: Tumor microenvironment dictates regulatory T cell phenotype: Upregulated immune checkpoints reinforce suppressive function
Source: PubMed Central journal article supplement (PMC6894345; doi:10.1186/s40425-019-0785-8), 2019-12-04

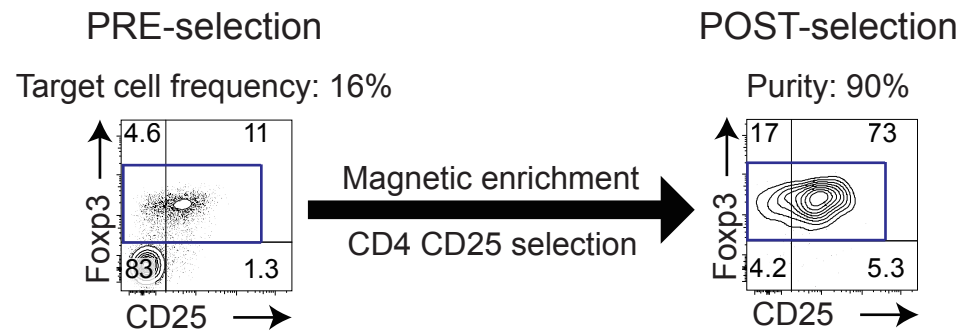

Supplement: 40425_2019_785_MOESM4_ESM.pdf [file 40425_2019_785_MOESM4_ESM.pdf]
